# Supplementary material for: MRI-Based Radiomics Features to Predict Treatment Response to Neoadjuvant Chemotherapy in Locally Advanced Rectal Cancer: A Single Center, Prospective Study
Source: PubMed Central journal article supplement (PMC9133669; doi:10.3389/fonc.2022.801743), 2022-05-12
Supplement: DataSheet_2.pdf [file DataSheet_2.pdf]

**Supplemental table 1.** Features that remained after each selection step for radiomics signature construction.

| features                            |                                                    |
|-------------------------------------|----------------------------------------------------|
| directed_data                       | source_data                                        |
| exponential_firstorder_Kurtosis     | gradient_glcM_Correlation                          |
| logarithm_glcM_IdmN                 | logarithm_gldM_SmallDependenceLowGrayLevelEmphasis |
| square_glszm_GrayLevelNonUniformity | logarithm_glrIm_LongRunHighGrayLevelEmphasis       |
| square_ngtdM_Strength               | wavelet.LLH_glcM_Imc1                              |
| wavelet.LLH_glcM_Correlation        | wavelet.LHL_firstorder_Kurtosis                    |
| wavelet.LHH_firstorder_Mean         | wavelet.LHH_firstorder_Skewness                    |
| wavelet.HLH_firstorder_Mean         | wavelet.LHH_glszm_ZoneEntropy                      |
| wavelet.HLH_firstorder_Median       | wavelet.HHL_firstorder_Mean                        |
| wavelet.HHH_firstorder_Median       | wavelet.HHH_firstorder_Median                      |
|                                     | wavelet.HHH_gldM_DependenceVariance                |
